# Supplementary material
Source: ML conference proceedings conference paper supplement (https://openreview.net/forum?id=Al2v6TfaABF)

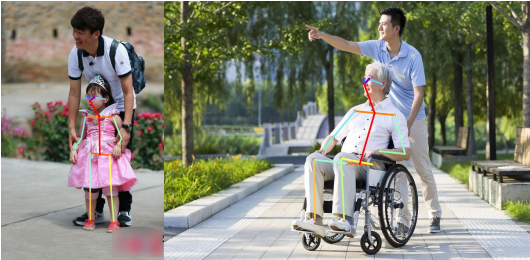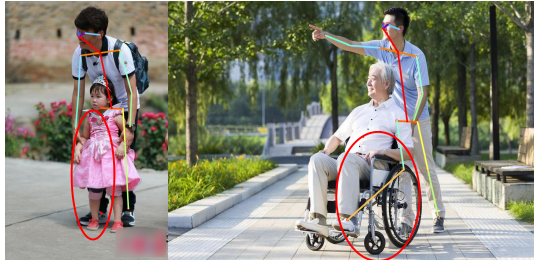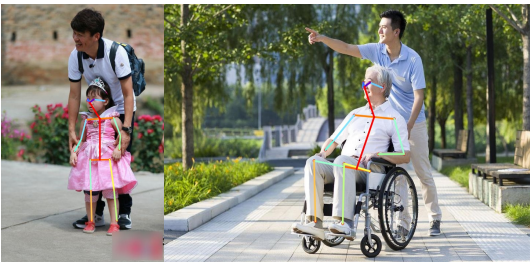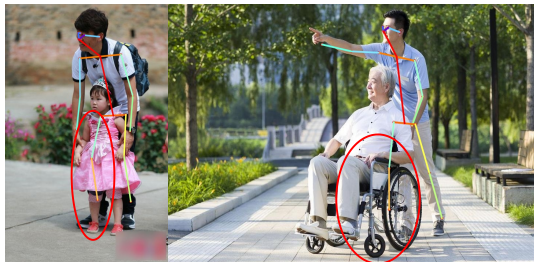

(a) The highest confidence score

(b) The 2nd highest confidence score

Supplement: supplementary_material [file attachment]

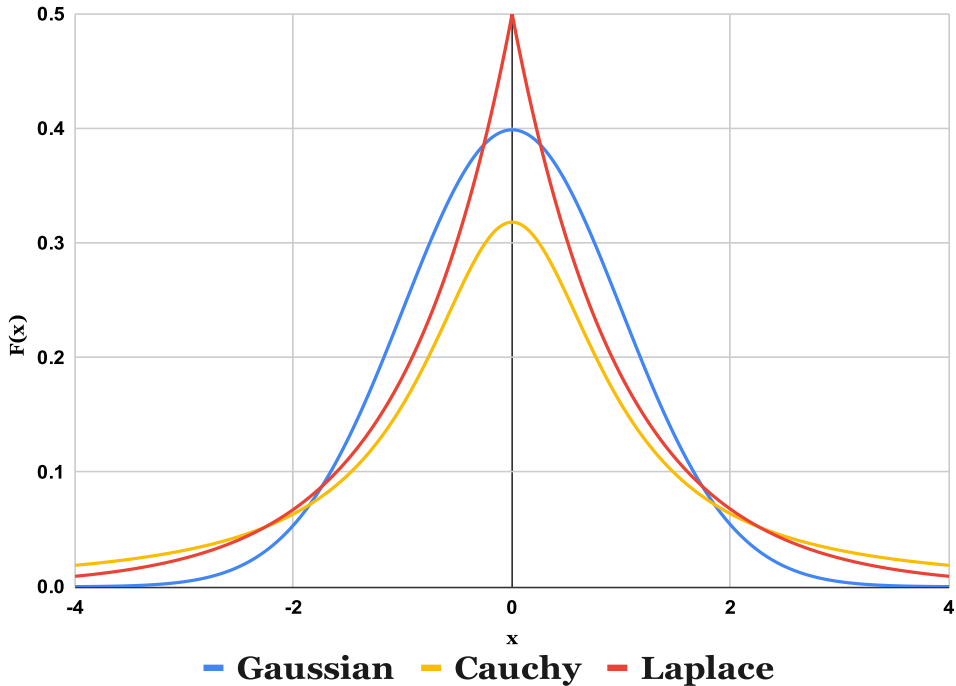

Supplement: supplementary_material [file attachment]

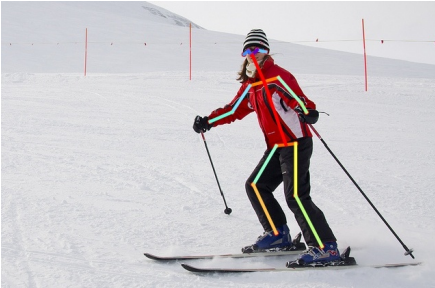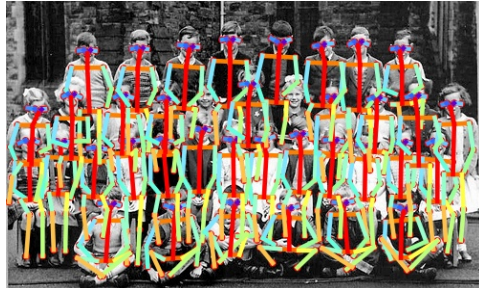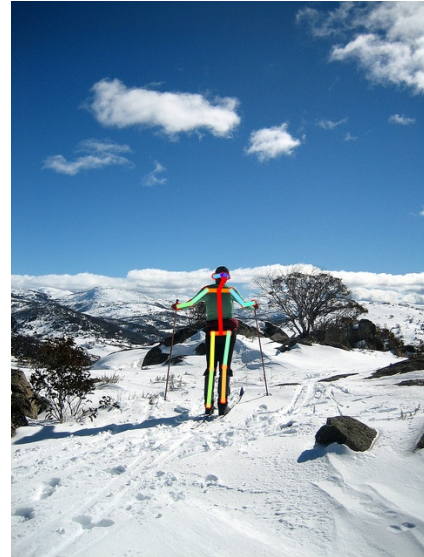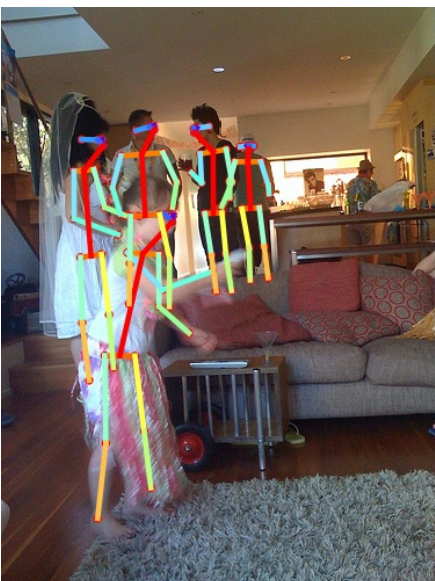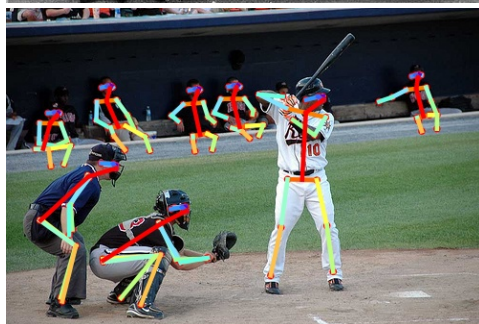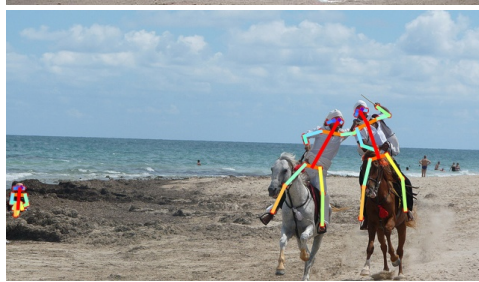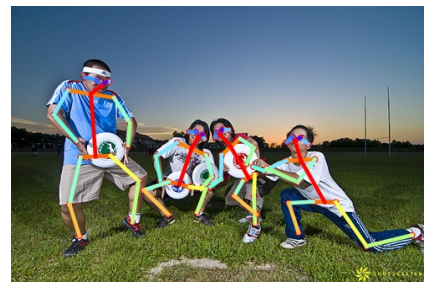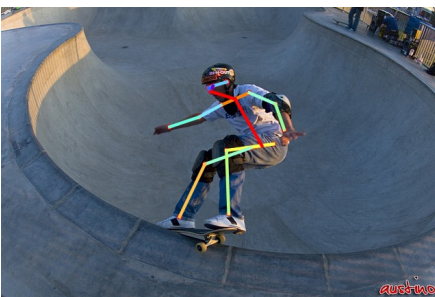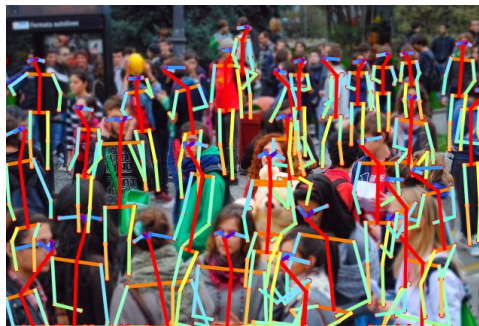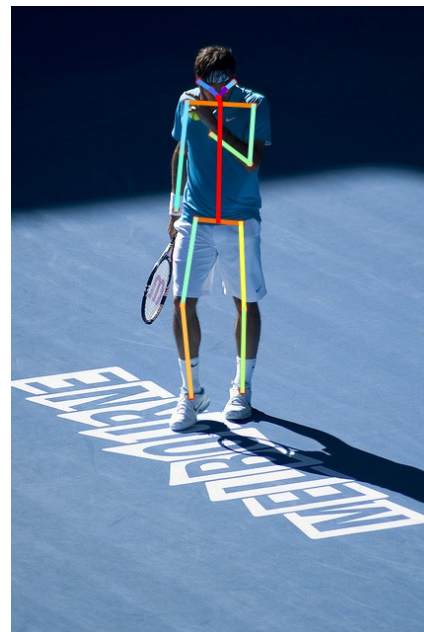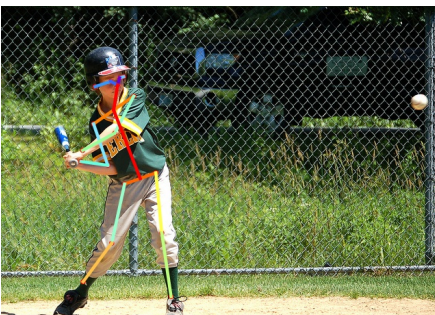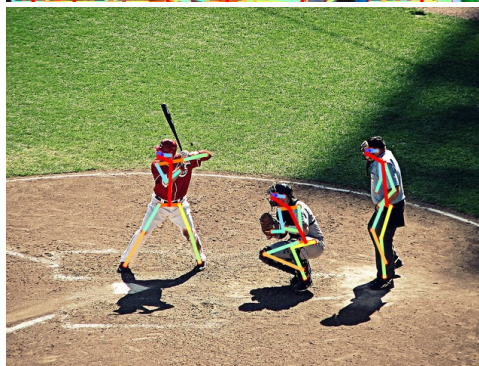

Supplement: supplementary_material [file attachment]

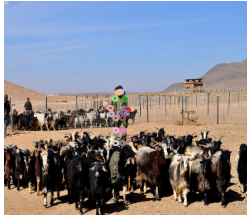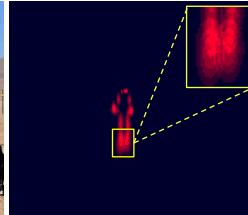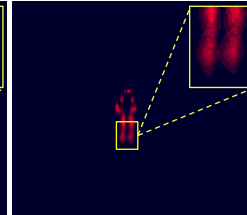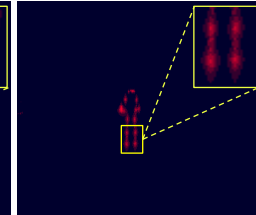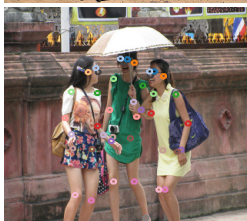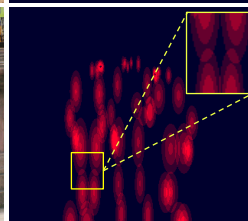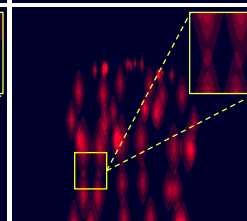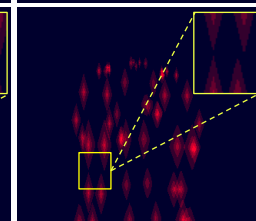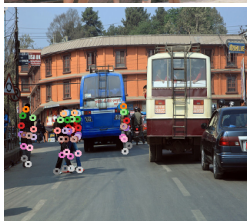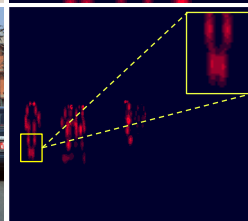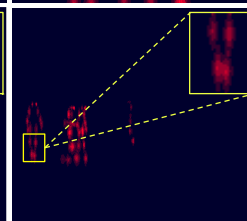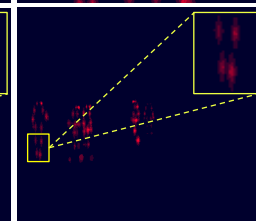

**GT Keypoints**

**Gaussian**

**Cauchy**

**Laplace**

Supplement: supplementary_material [file attachment]

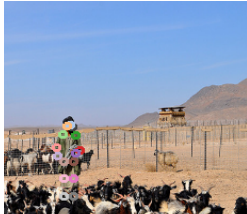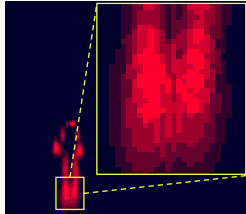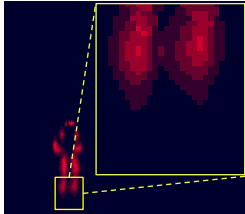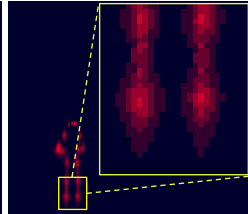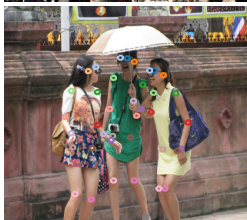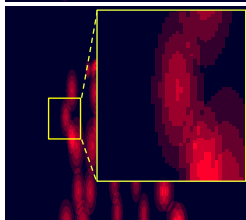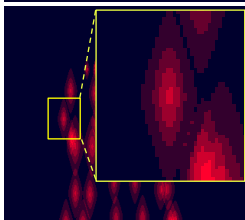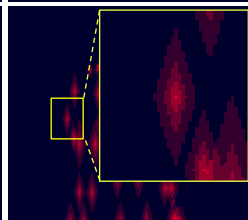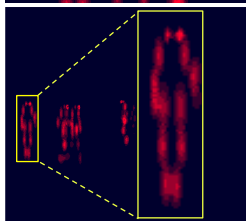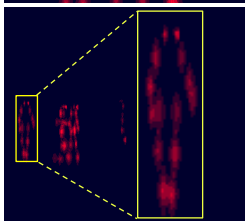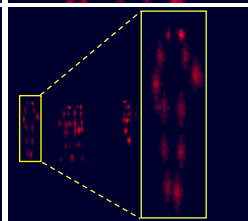

**GT Keypoints**

**Gaussian**

**Cauchy**

**Laplace**

Supplement: supplementary_material [file attachment]

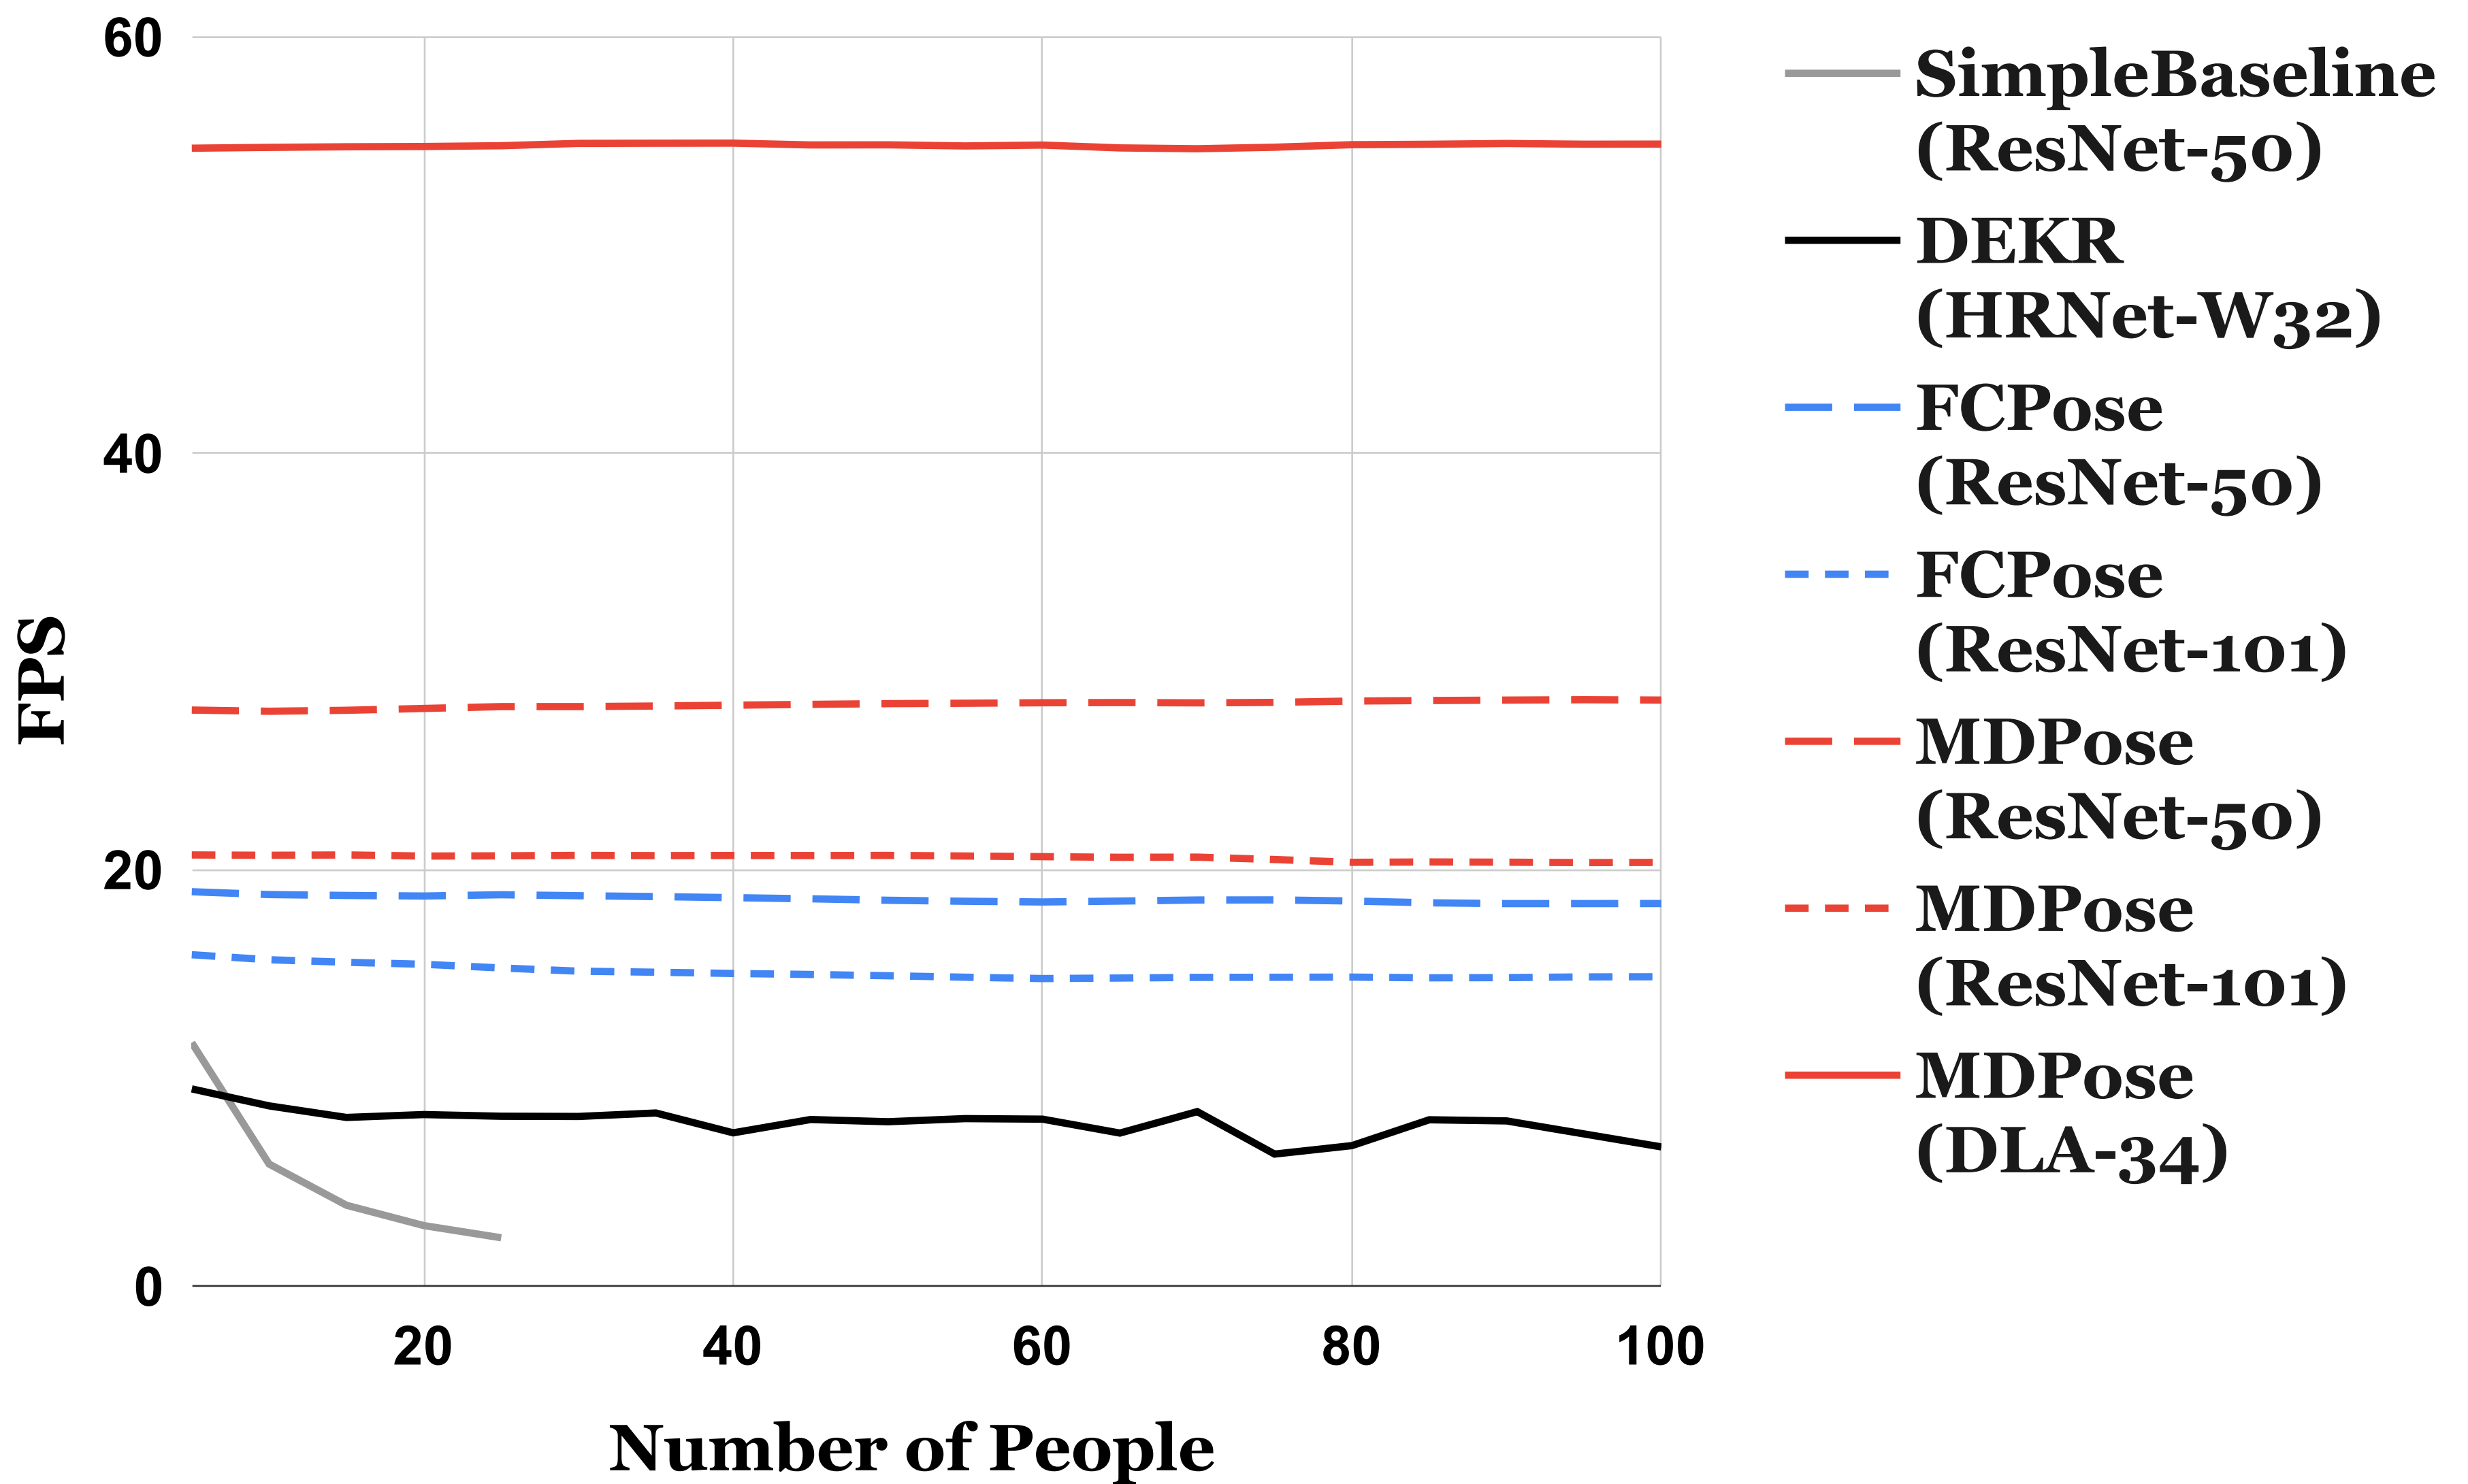

Supplement: supplementary_material [file attachment]

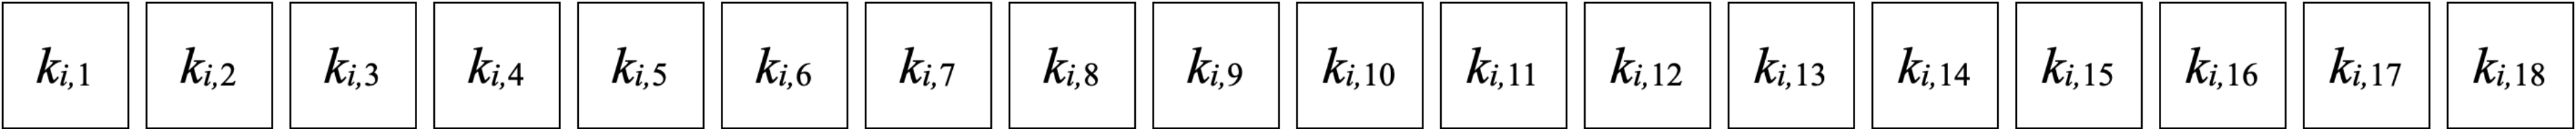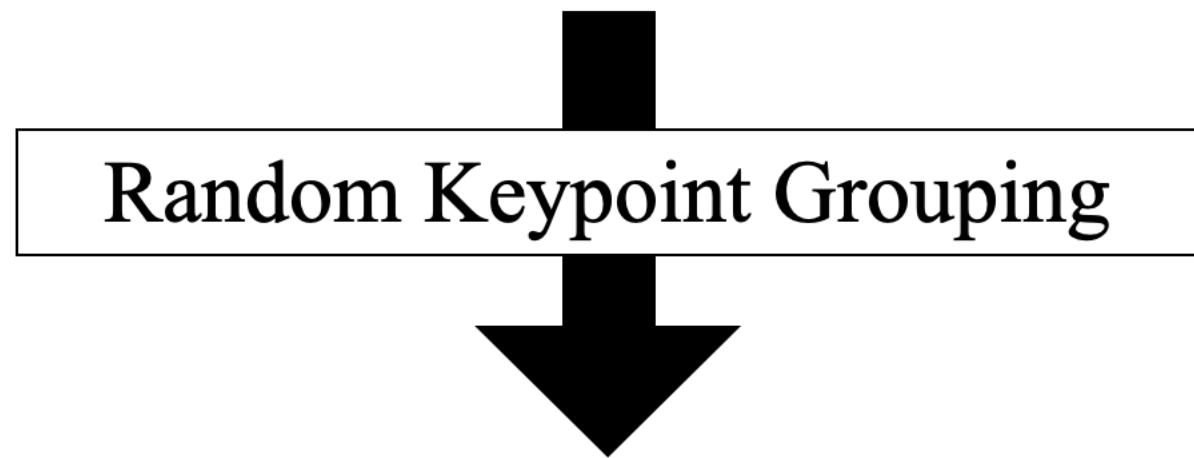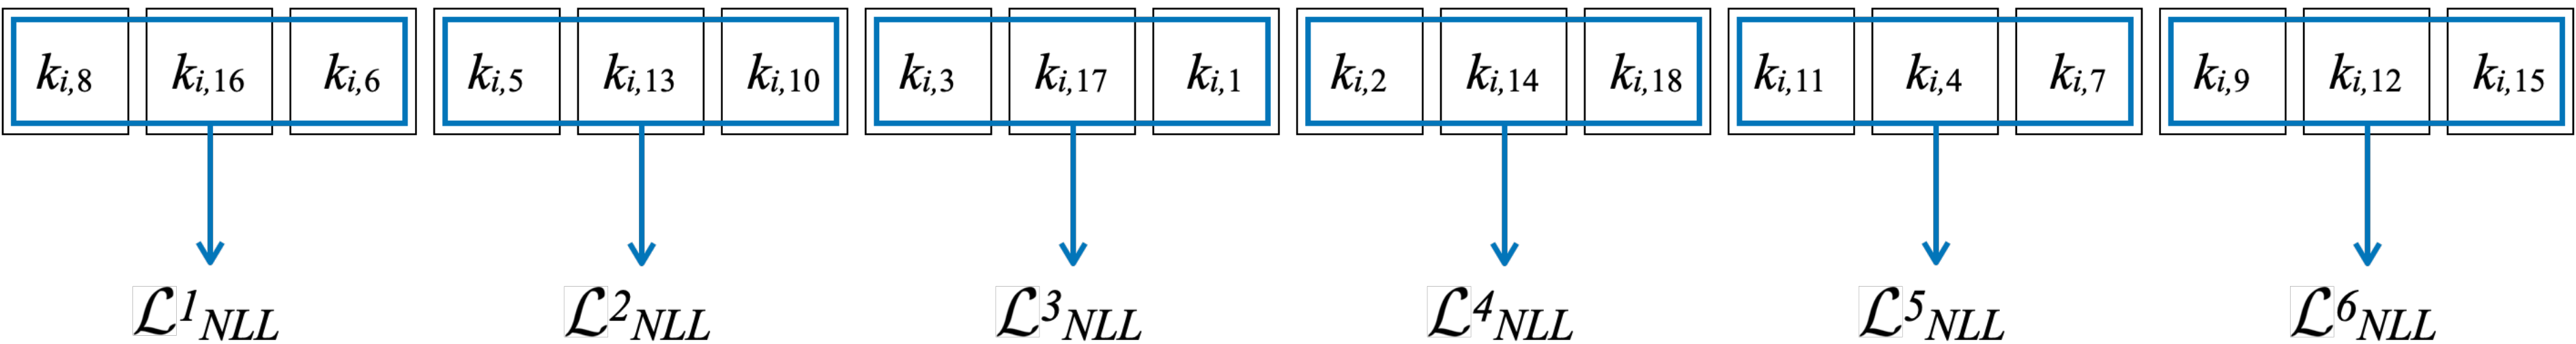

Supplement: supplementary_material [file attachment]

(a)

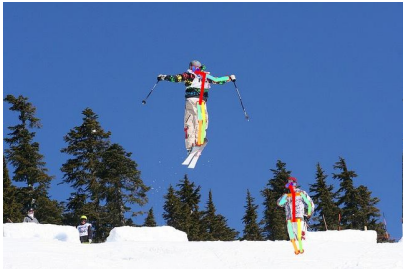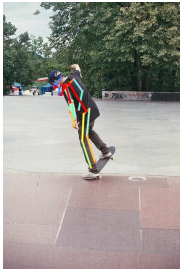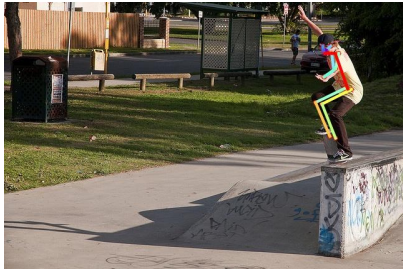

(b)

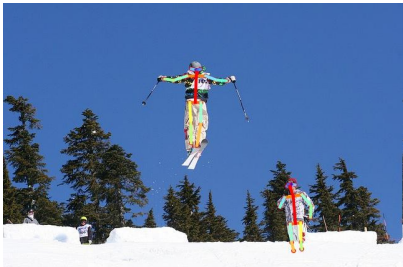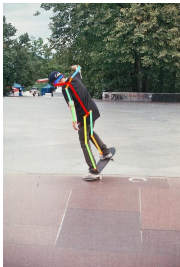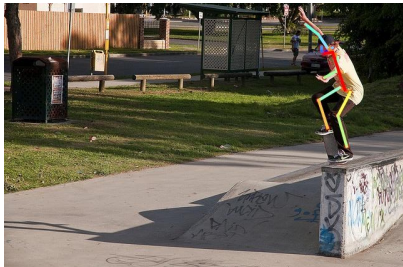

Supplement: supplementary_material [file attachment]

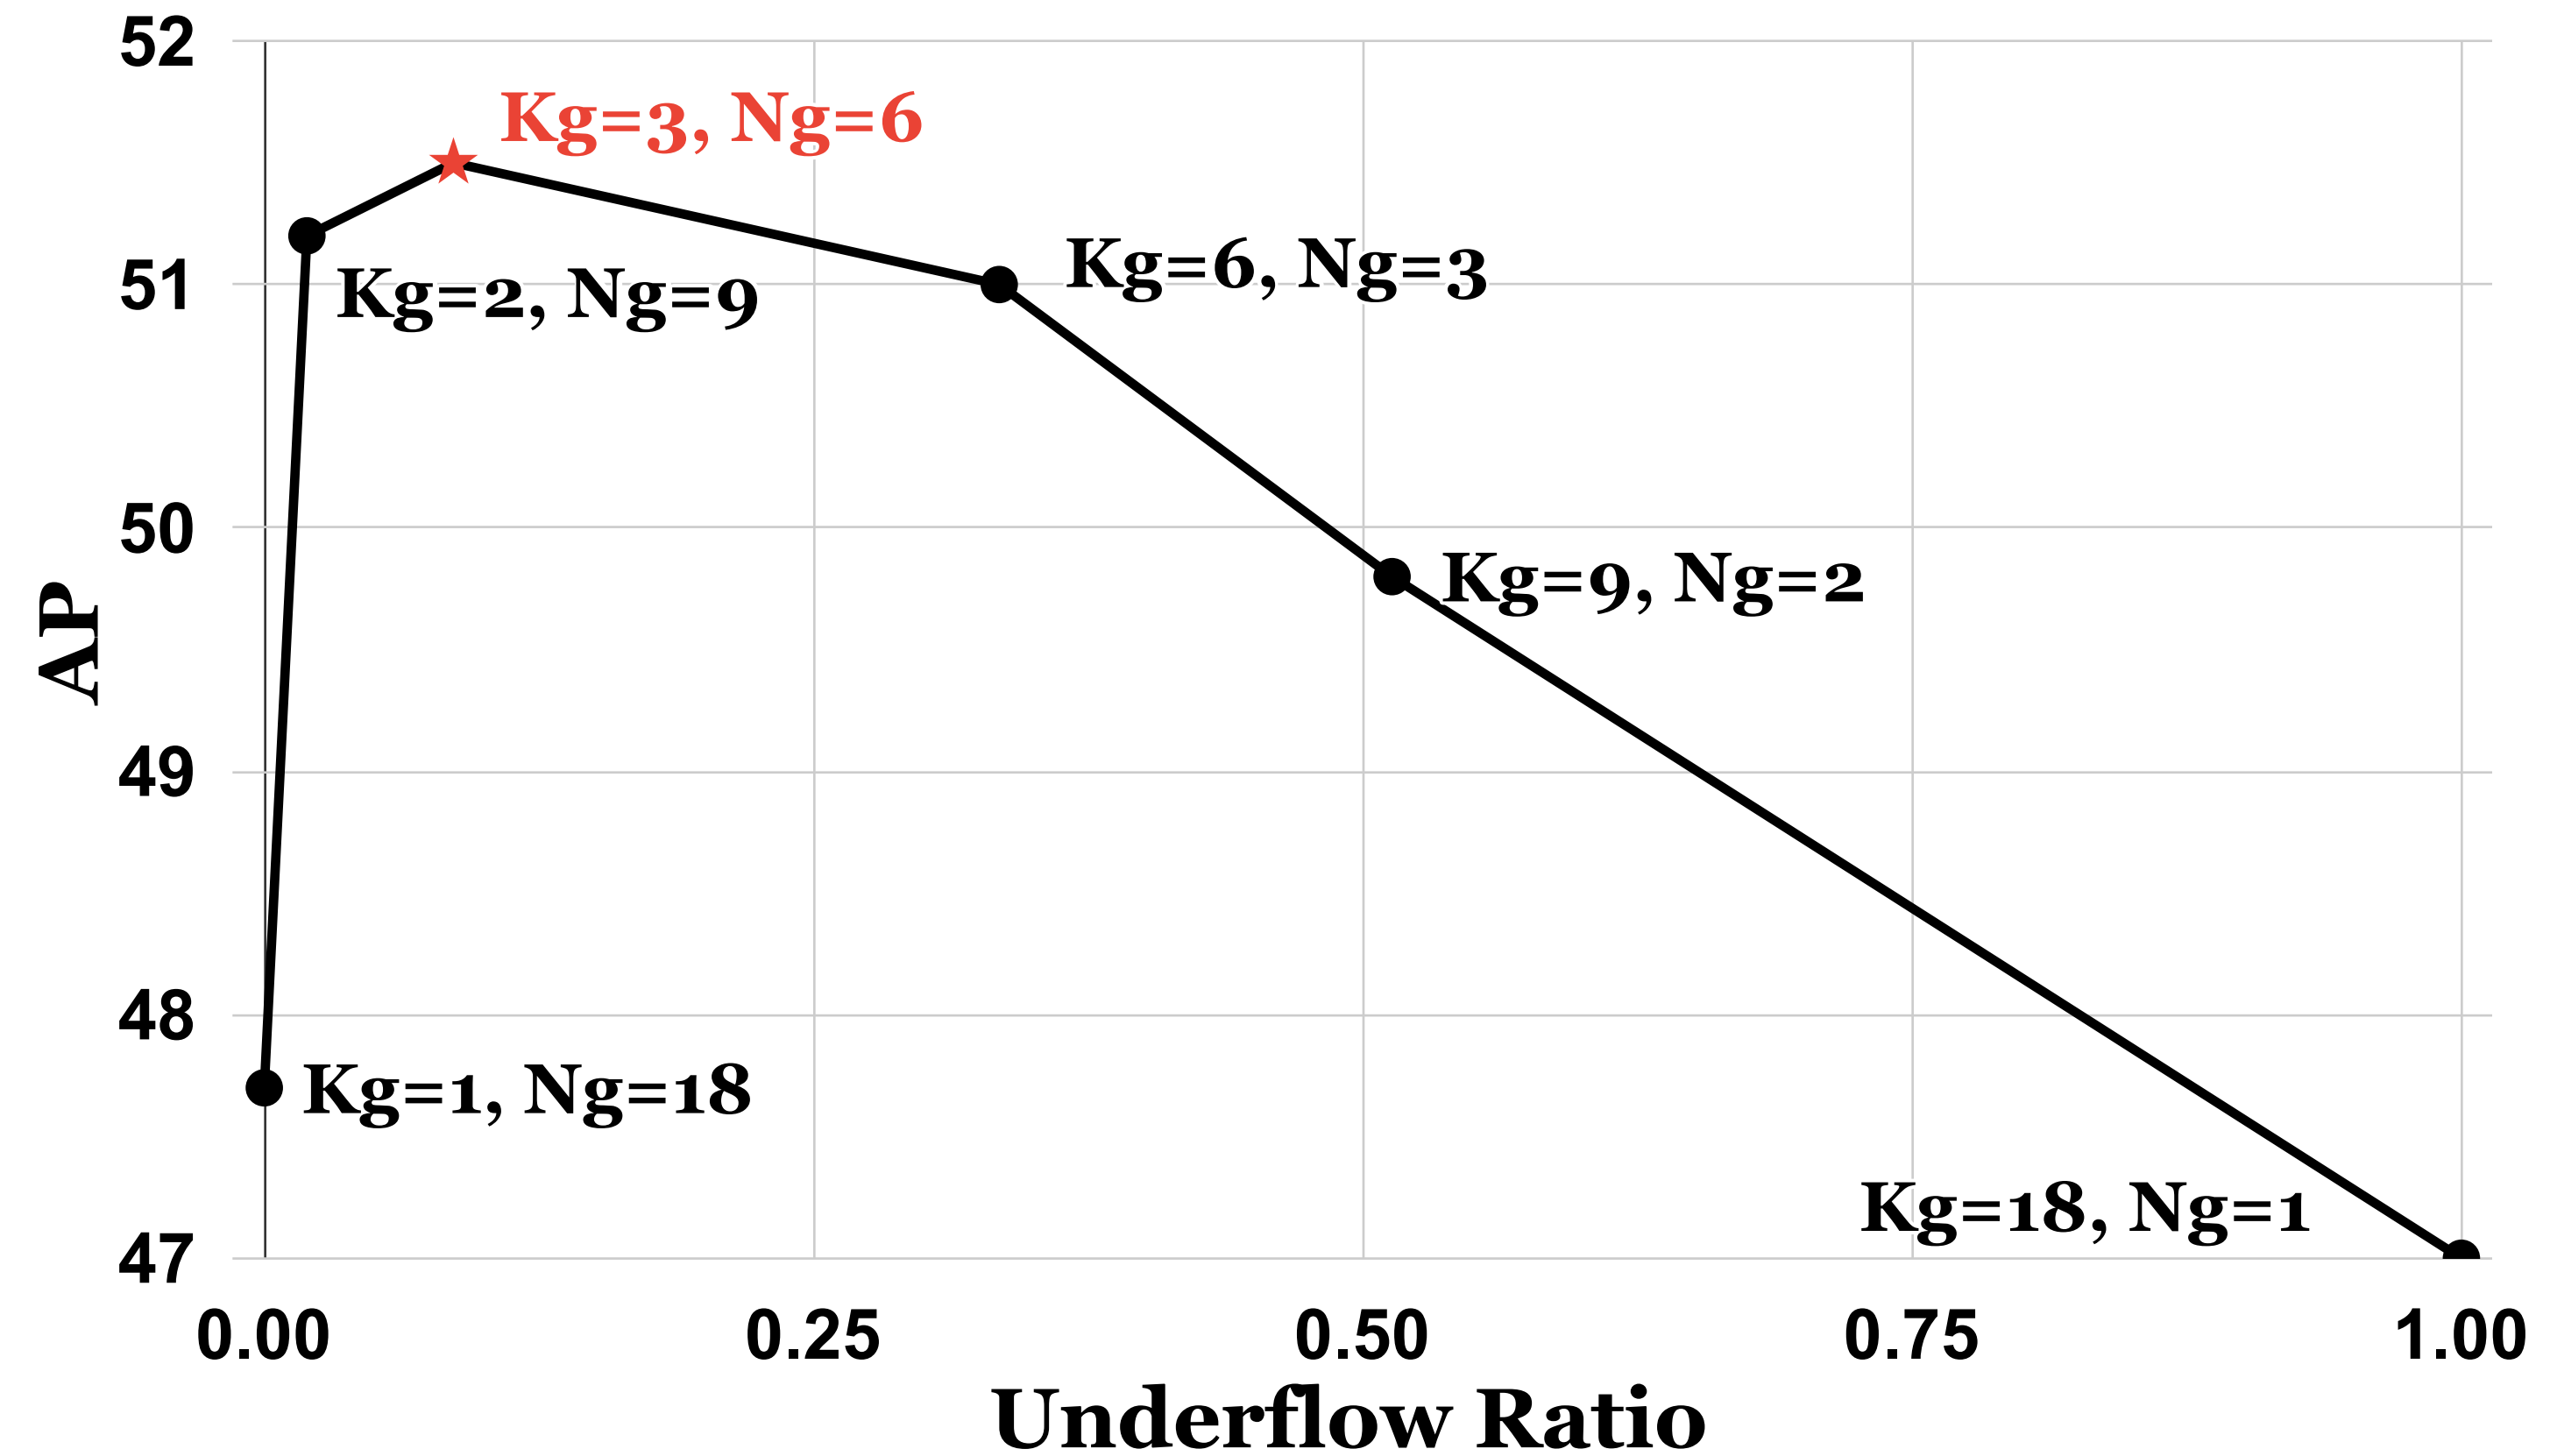

Supplement: supplementary_material [file attachment]

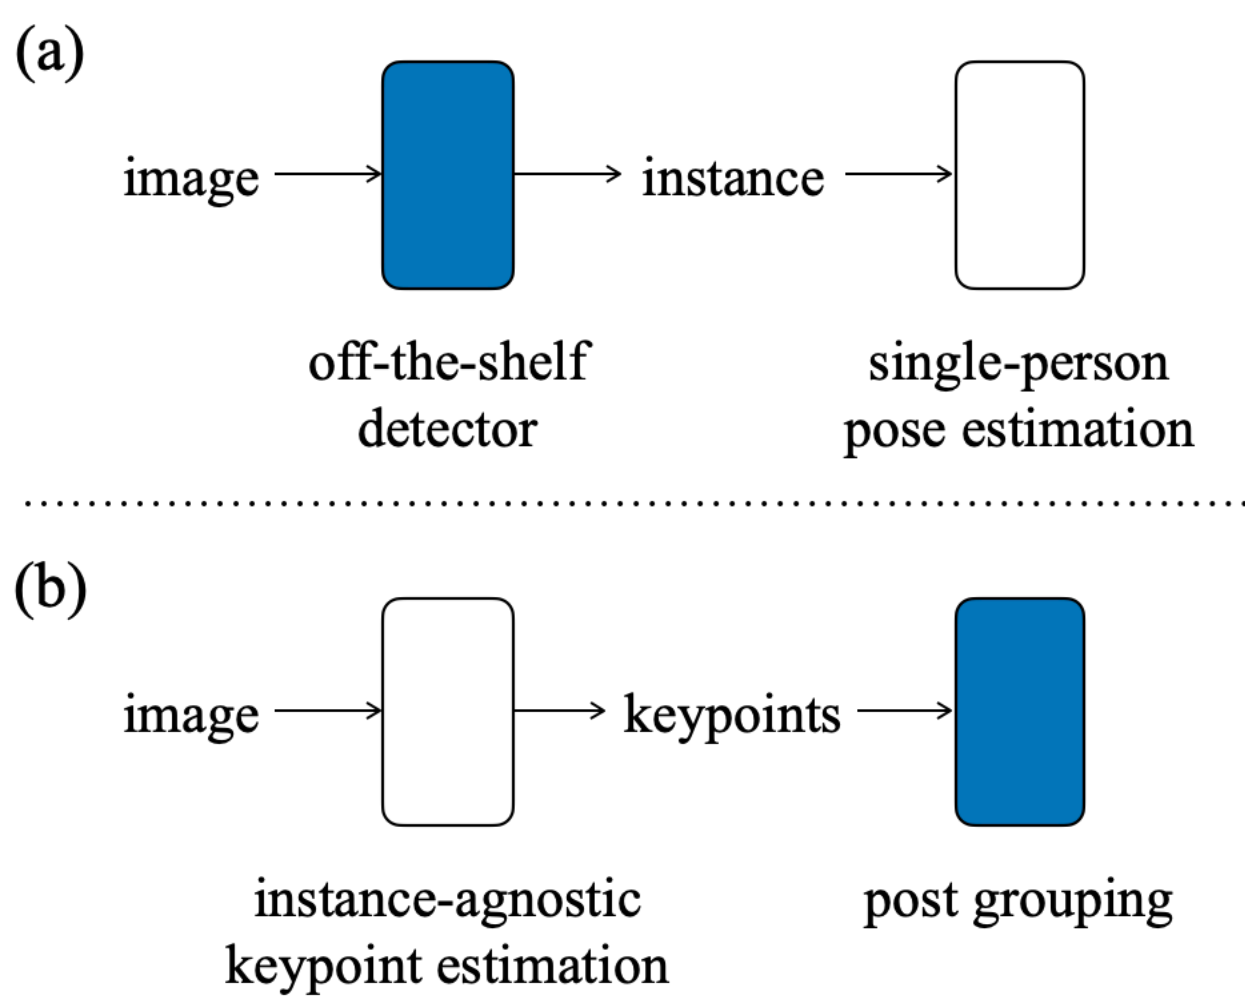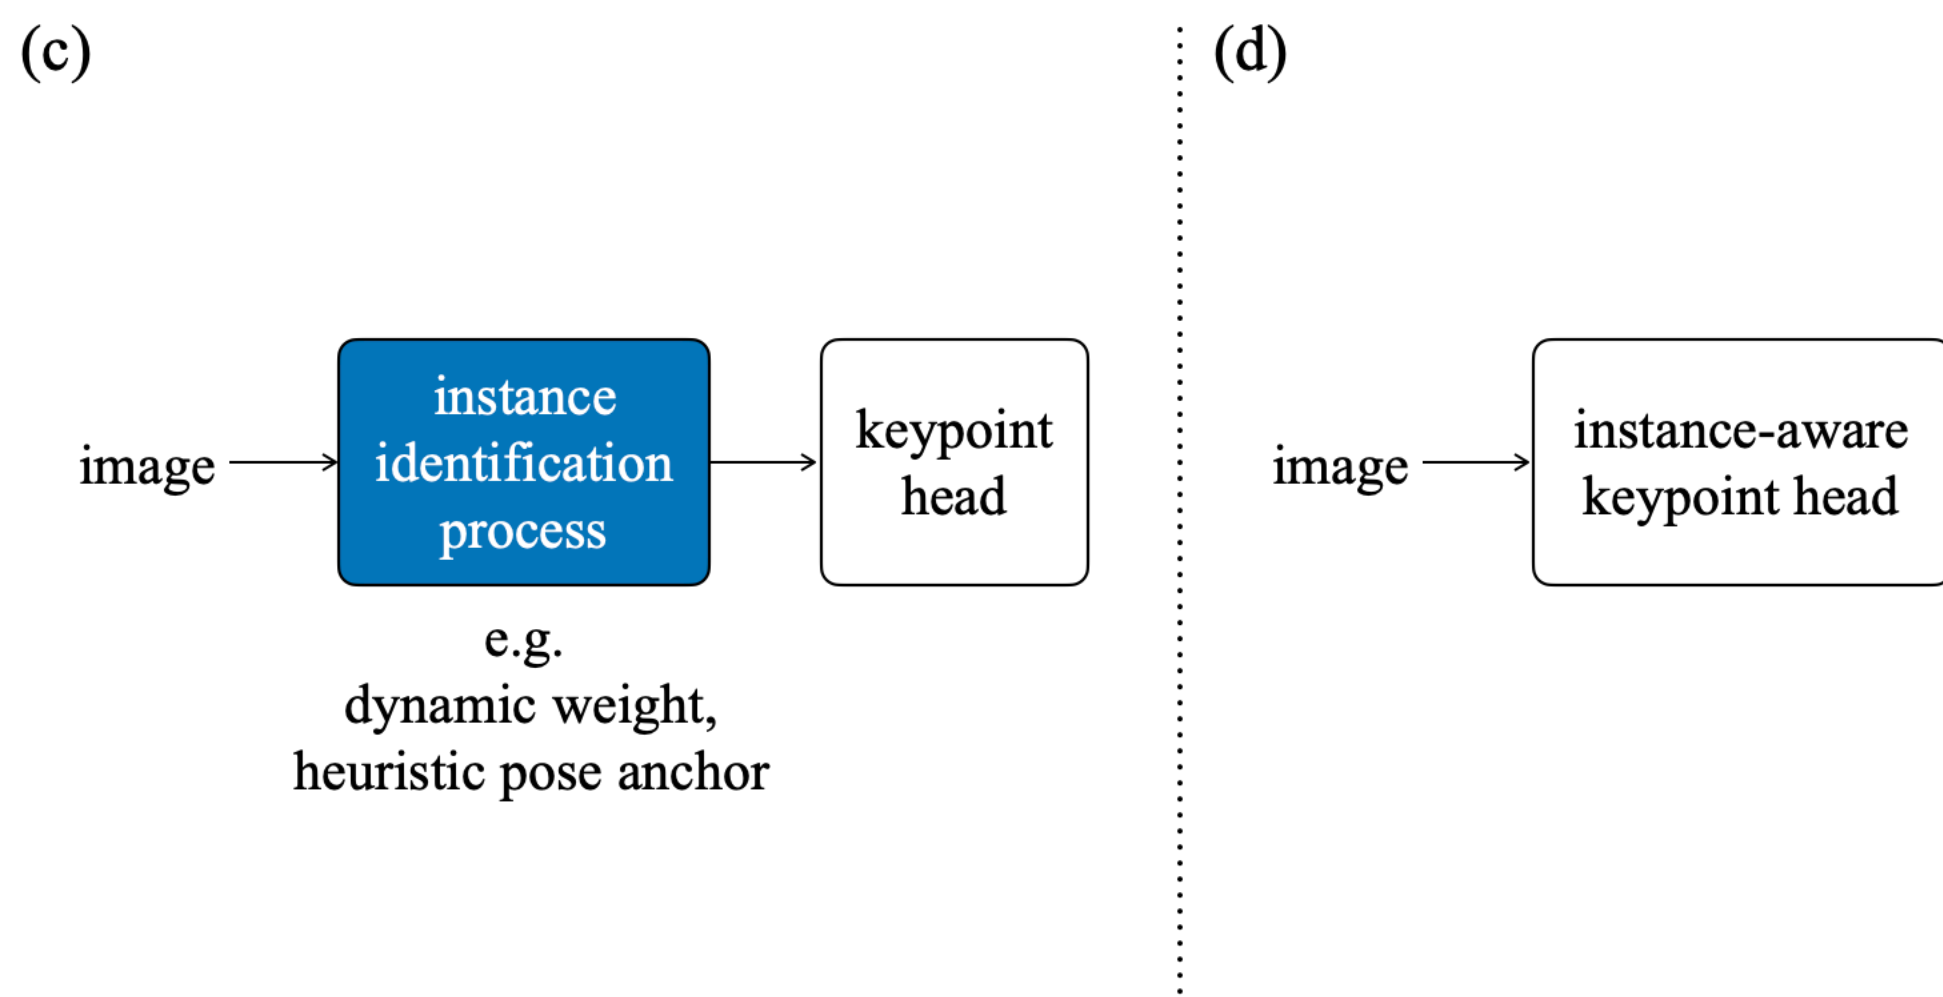

Supplement: supplementary_material [file attachment]

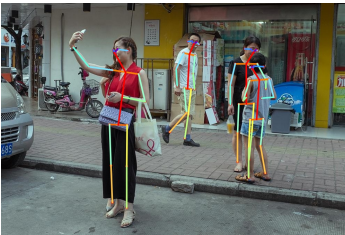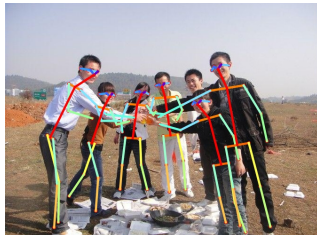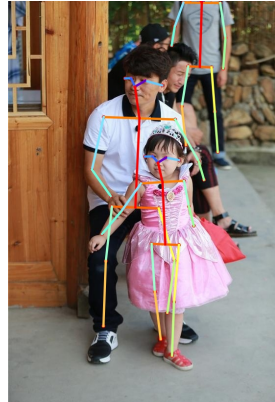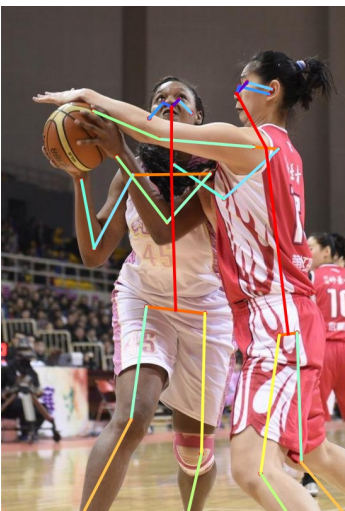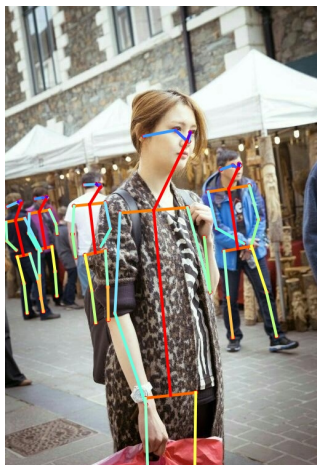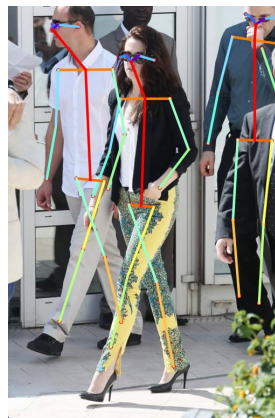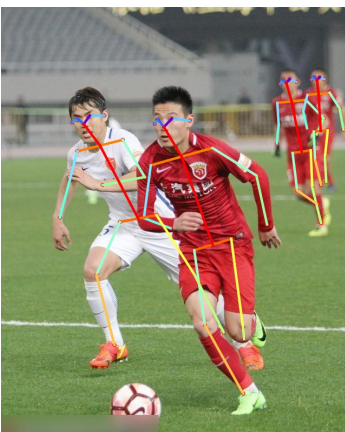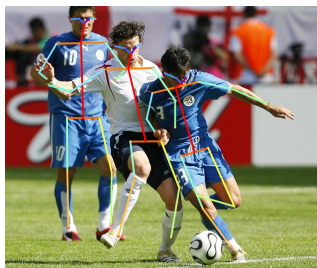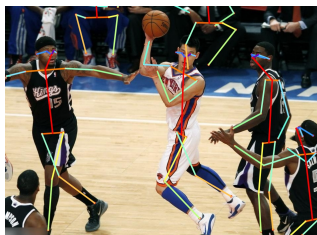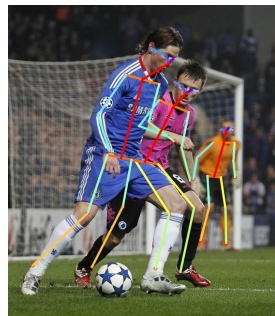

Supplement: supplementary_material [file attachment]

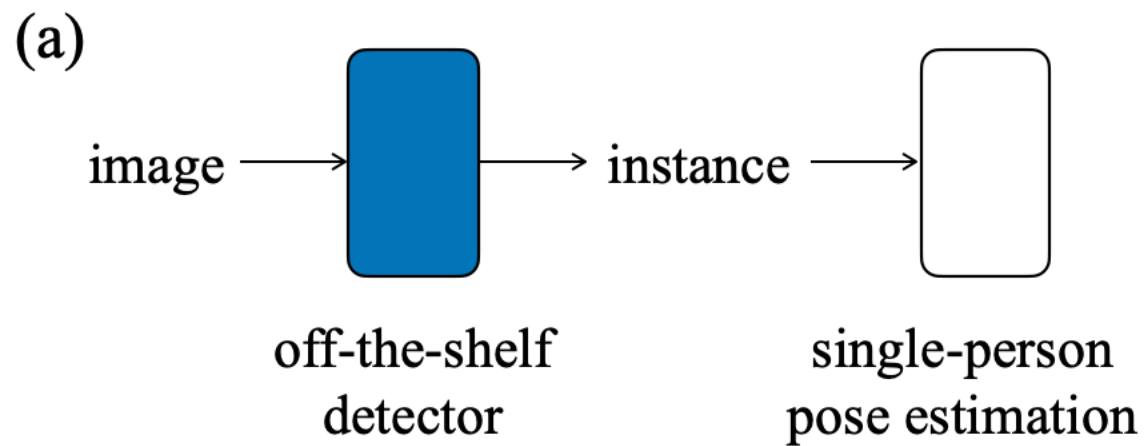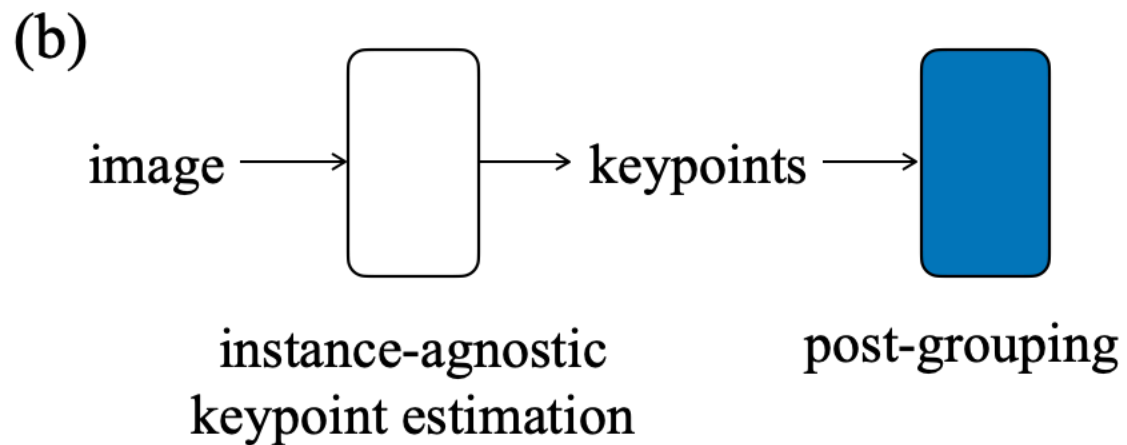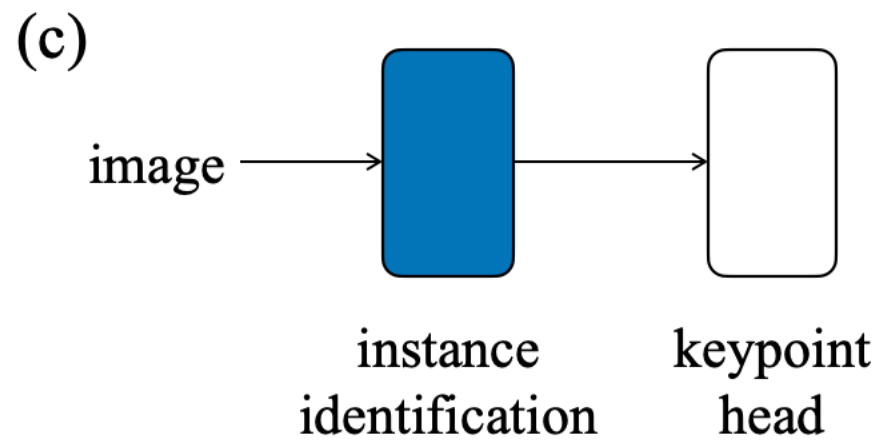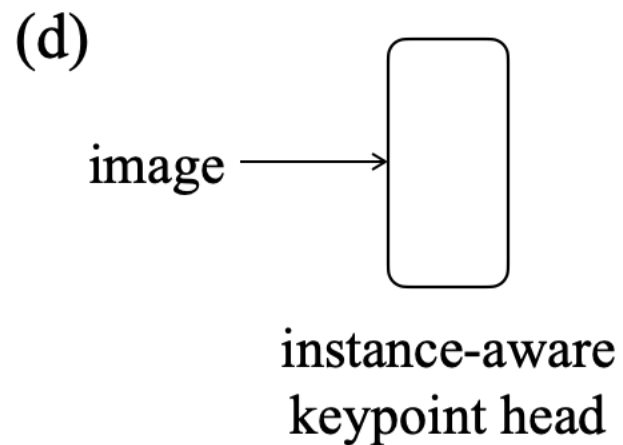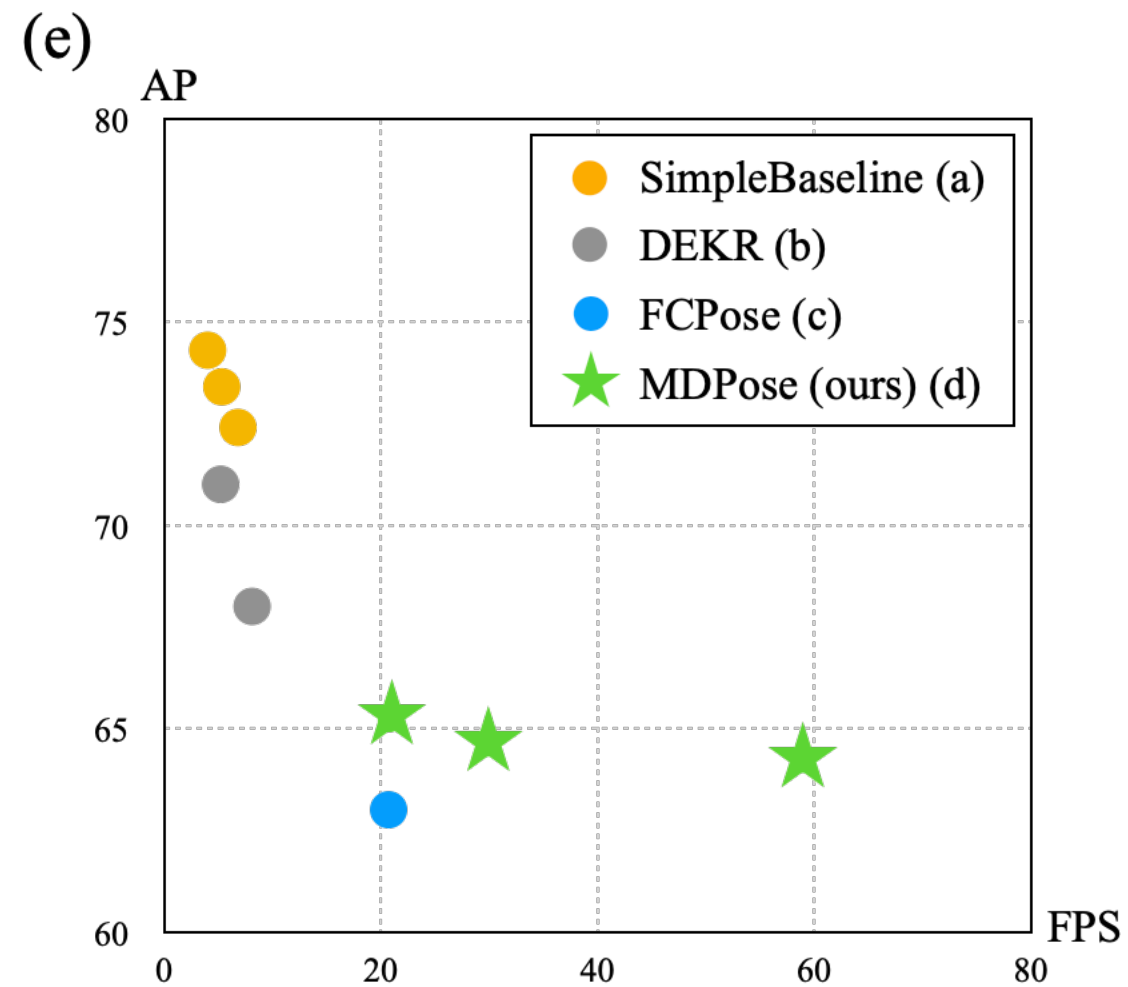

Supplement: supplementary_material [file attachment]

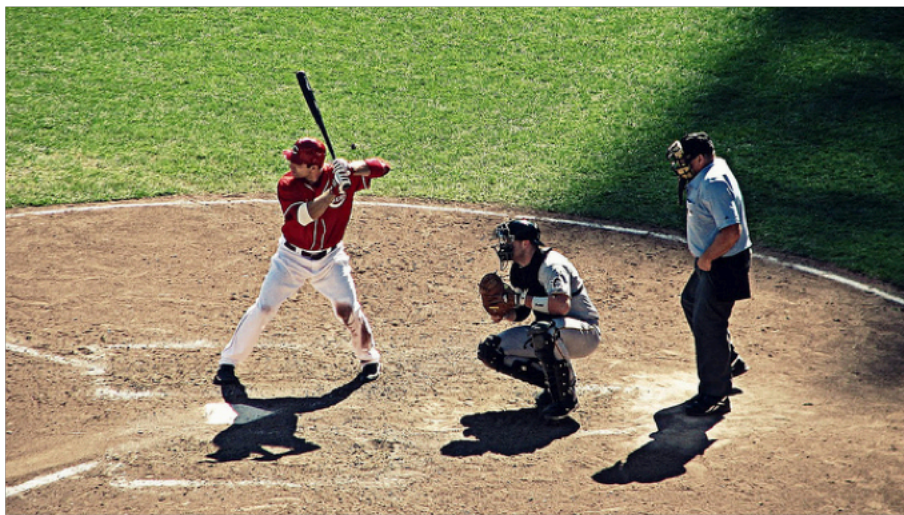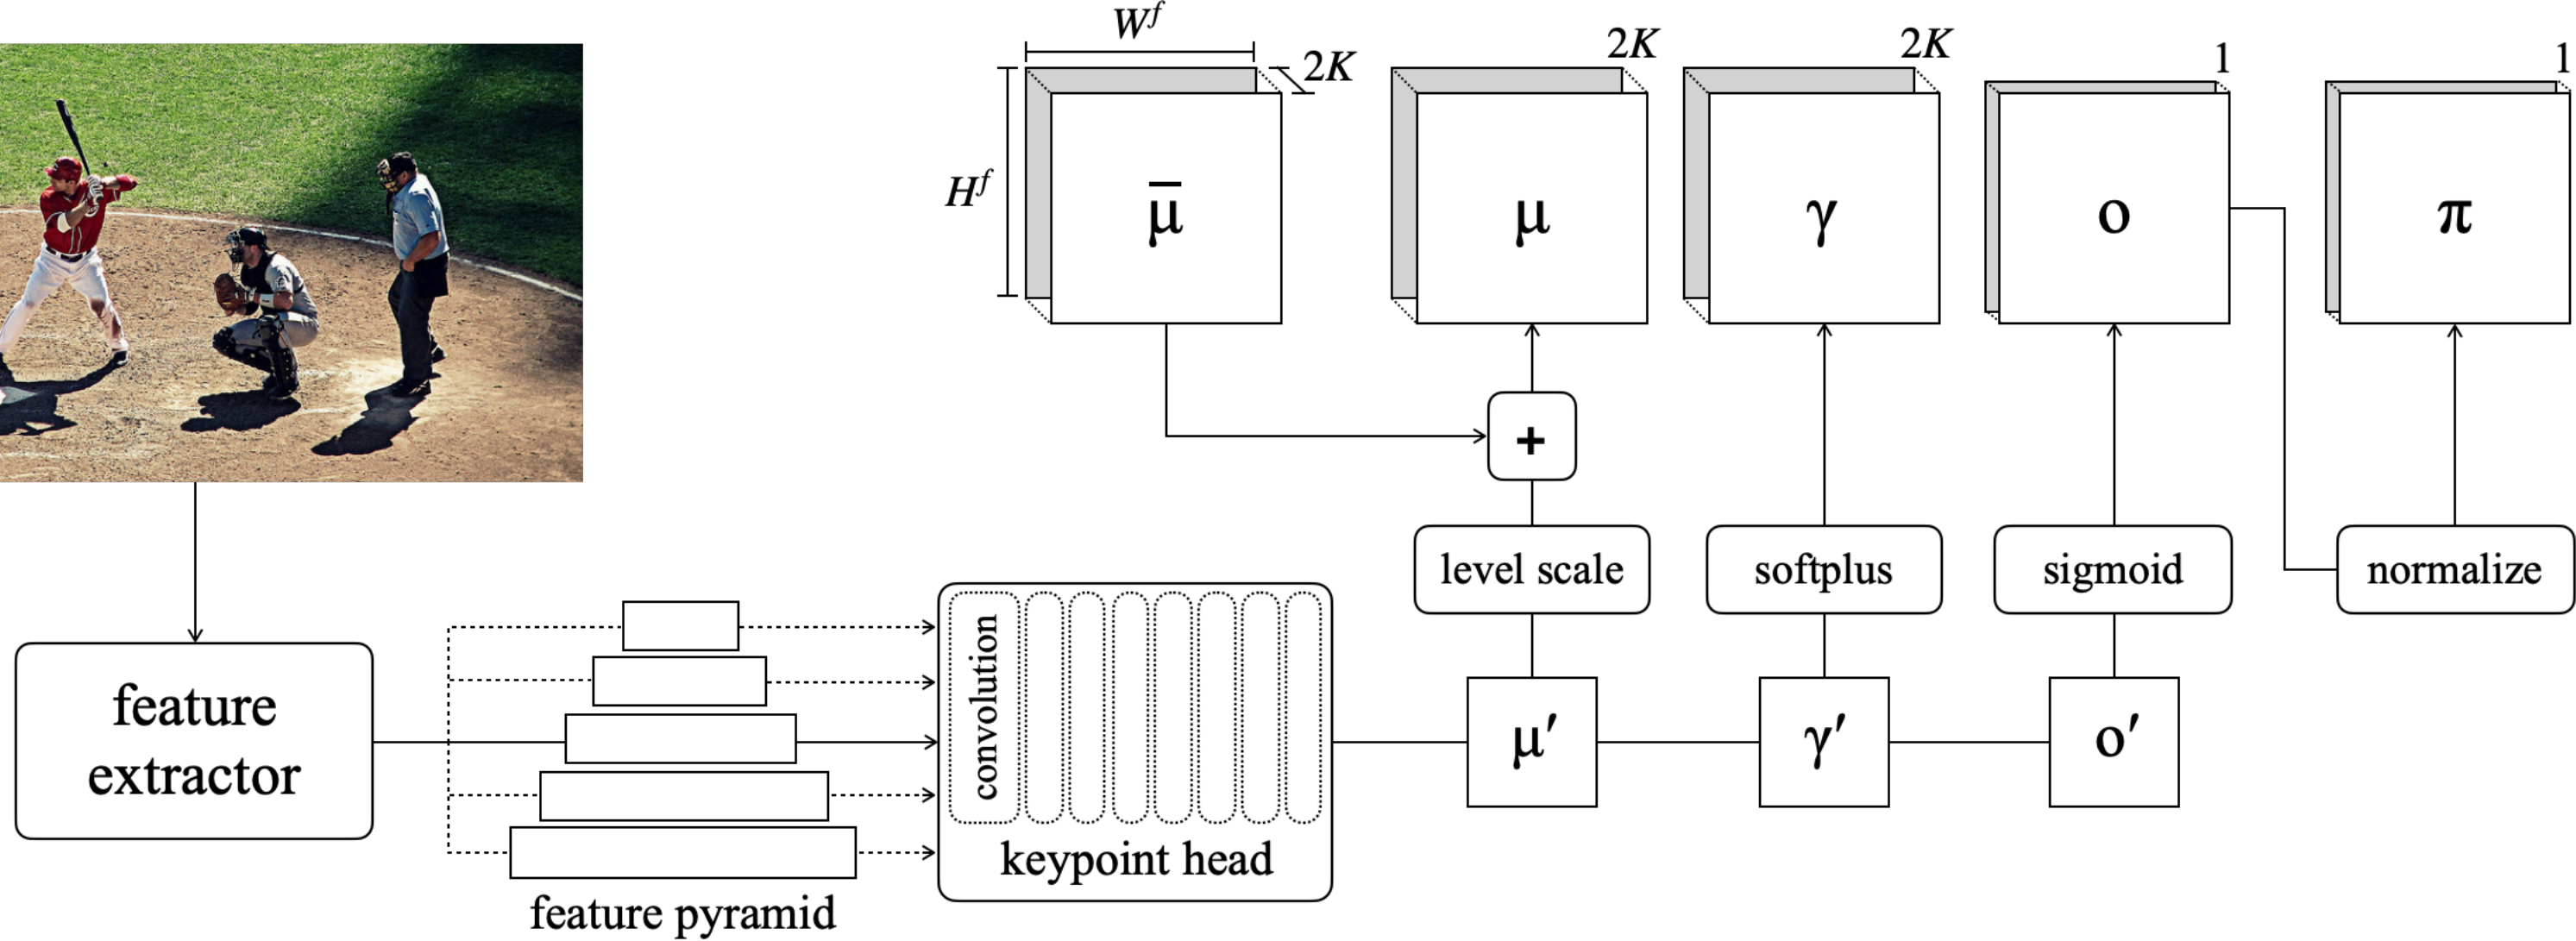

Supplement: supplementary_material [file attachment]
